# Supplementary material for: Adverse Event Management in Patients with Platinum-Resistant Ovarian Cancer Treated with Niraparib and Anlotinib: Updates from the Phase II, Multi-Center ANNIE Study
Source: Research Square preprint supplement (doi:10.21203/rs.3.rs-3577949/v1), 2023-11-10
Supplement: Supplementary file 2 [file 956172ced7dc5fb6e4a145b1.docx]

**Supplementary Material**

**Supplementary Table S1. Worst-state ECOG scores relative to baseline (N=40)**

| **n (%)** | **Baseline Scores** | | | | | | **Total**  **No. (%)** |
| --- | --- | --- | --- | --- | --- | --- | --- |
| **0** | **1** | **2** | **3** | **4** | **5** |
| **Worst-state Scores** |  |  |  |  |  |  |  |
| **0** | 25 (69.4) | 3 (8.3) |  |  |  |  | 28 (77.8) |
| **1** |  | 8 (22.2) |  |  |  |  | 8 (22.2) |
| **2** |  |  |  |  |  |  |  |
| **3** |  |  |  |  |  |  |  |
| **4** |  |  |  |  |  |  |  |
| **5** |  |  |  |  |  |  |  |
| **Total** | 25 (69.4) | 11 (30.6) |  |  |  |  |  |

ECOG, Eastern Cooperative Oncology Group.

**
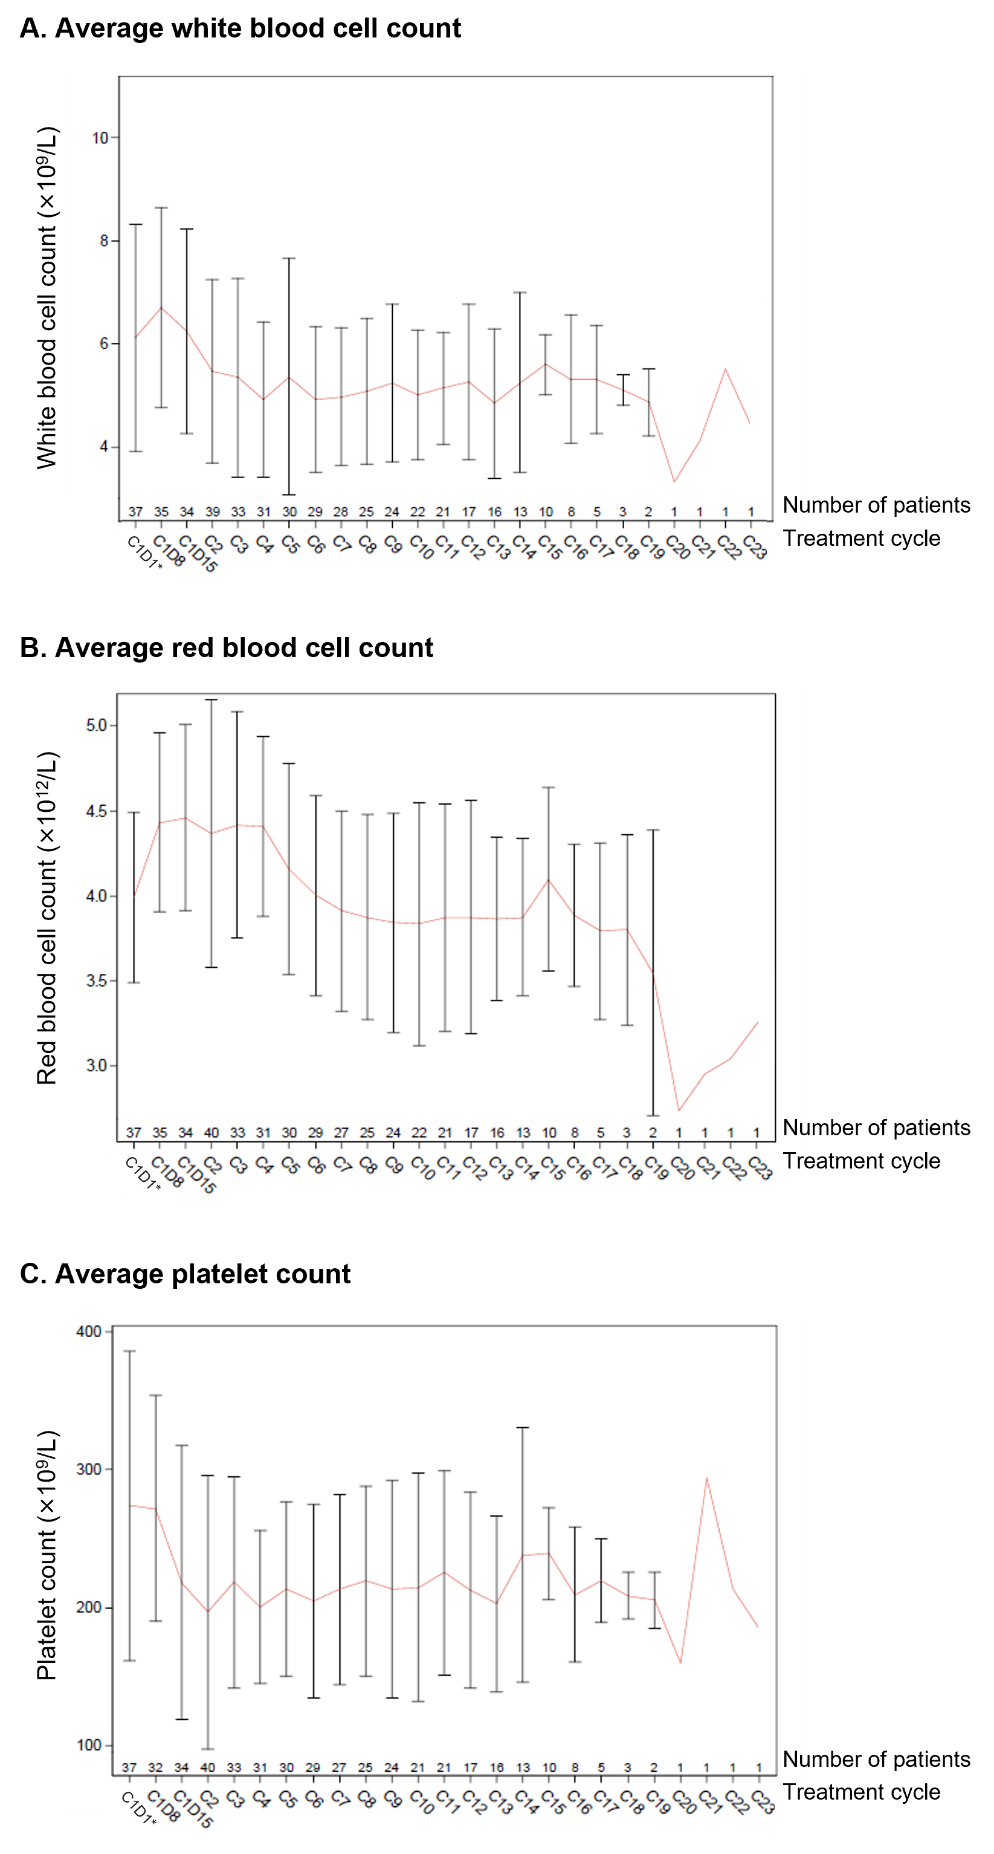
**

**Supplemental Figure S1.** Complete blood count in the intention-to-treat population (N=40). *For some patients, the data used were from the screening period.
